# Supplementary material for: A Literature Review of the Effects of Air Pollution on COVID-19 Health Outcomes Worldwide: Statistical Challenges and Data Visualization
Source: PubMed Central journal article supplement (PMC11567163; doi:10.1146/annurev-publhealth-071521-120424), 2022-12-21
Supplement: NIHMS2031411-supplement-Supplemental_Material.pdf [file NIHMS2031411-supplement-Supplemental_Material.pdf]

# A New Approach for Evidence Synthesis

Import and potentially install necessary Python packages.

In [1]:

```
import sys
import pandas as pd
import json
import time
import datetime

try:
    import crossref_commons.retrieval
except ImportError as e:
    print('Required module crossref_commons not found: reinstalling')
    t = time.process_time()
    !{sys.executable} -m pip install crossref_commons
    elapsed_time = time.process_time() - t
    import crossref_commons.retrieval
    print('Installation time (hh:mm:ss): ' + str(datetime.timedelta(seconds=elapsed_time)))

try:
    from habanero import cn
    #from habanero import counts
except ImportError as e:
    print('Required module habanero not found: reinstalling')
    t = time.process_time()
    !{sys.executable} -m pip install habanero
    elapsed_time = time.process_time() - t
    from habanero import cn
    #from habanero import counts
    print('Installation time (hh:mm:ss): ' + str(datetime.timedelta(seconds=elapsed_time)))

try:
    from semanticscholar import SemanticScholar
except ImportError as e:
    print('Required module SemanticScholar not found: reinstalling')
    t = time.process_time()
    !{sys.executable} -m pip install semanticscholar
    elapsed_time = time.process_time() - t
    from semanticscholar import SemanticScholar
    print('Installation time (hh:mm:ss): ' + str(datetime.timedelta(seconds=elapsed_time)))

try:
    from crossref.restful import Works
except ImportError as e:
    print('Required module crossrefapi not found: reinstalling')
    t = time.process_time()
    !{sys.executable} -m pip install crossrefapi
    elapsed_time = time.process_time() - t
    from crossref.restful import Works
    print('Installation time (hh:mm:ss): ' + str(datetime.timedelta(seconds=elapsed_time)))
```

Read the literature review spreadsheet and create a data frame.

In [2]:

```
dataset = '/arctis/home/all_papers_new_format_version_5_kab.xlsx'
```

```

df = pd.read_excel(dataset)
df = df[df['DOI'].notna()]
uniqueID = df.groupby(['DOI']).ngroup()
df.insert(0, "ID", uniqueID)
df.head()

```

In [4]:

```

def getAuthors(namesDic):
    #print(namesDic)
    numAuthors = len(namesDic)

    namesList = ""
    for i in range(numAuthors):
        try:
            first = namesDic[i]["given"]
        except KeyError as e:
            first = ''
        try:
            last = namesDic[i]['family']
        except KeyError as e:
            last = ''
        namesList += first + " " + last
        if i != numAuthors - 1:
            namesList += ", "

    return namesList

```

For each unique DOI, find the author information (affiliation) and generate an APA formatted citation.

In [10]:

```

uniqueDOIs = df["DOI"]

title = []
authors = []
citation = []
year = []
publishDates = []
citationCountsHabanero = []

for doi in uniqueDOIs:
    print("Checking DOI: " + doi)
    # Get JSON of the paper from CrossRef
    paperJSON = crossref_commons.retrieval.get_publication_as_json(doi)

    # Get papers title
    title.append(paperJSON['title'][0])

    # Get Authors names
    # print(paperJSON['author'])
    names = getAuthors(paperJSON['author'])
    authors.append(names)

    # Get Citations
    apaCitation = cn.content_negotiation(doi, format="text", style="apa")
    citation.append(apaCitation)

    # Get year published

```

```

year.append(paperJSON['created']['date-parts'][0][0])
YYYY = paperJSON['created']['date-parts'][0][0]
MM = paperJSON['created']['date-parts'][0][1]
DD = paperJSON['created']['date-parts'][0][2]
publishDates.append(datetime.datetime(YYYY, MM, DD))

# Get the citation counts from habanero package
# print(counts.citation_count(doi))
try:
    citationCountsHabanero.append(paperJSON['is-referenced-by-count'])
except:
    citationCountsHabanero.append(None)
pass

```

```

In [11]: df['Paper Title'] = title
df['Authors'] = authors
df['Year'] = year
df['Citation (APA)'] = citation
df['Citation Counts Habanero'] = citationCountsHabanero
df.head()
#output.to_csv("output.csv", index=False)

```

Out[11]:

| ID | DOI | Study Area Country                                                                                  | Study Area Admin Level 1          | Paper Title                                       | Authors                                           | Year                                              | Citation (APA) | H:                                                |
|----|-----|-----------------------------------------------------------------------------------------------------|-----------------------------------|---------------------------------------------------|---------------------------------------------------|---------------------------------------------------|----------------|---------------------------------------------------|
| 29 | 0   | <a href="https://doi.org/10.1007/s10640-020-00486-1">https://doi.org/10.1007/s10640-020-00486-1</a> | Italy                             | NaN                                               | The Effects of Air Pollution on COVID-19 Relat... | Eric S. Coker, Laura Cavalli, Enrico Fabrizi, ... | 2020           | Coker, E. S., Cavalli, L., Fabrizi, E., Guaste... |
| 15 | 1   | <a href="https://doi.org/10.1007/s10640-020-00491-4">https://doi.org/10.1007/s10640-020-00491-4</a> | Netherlands                       | Aa en Hunze, Aalsmeer, Aalten, Achtkarspelen, ... | Air Pollution Exposure and Covid-19 in Dutch M... | Matthew A. Cole, Ceren Ozgen, Eric Strobl         | 2020           | Cole, M. A., Ozgen, C., & Strobl, E. (2020). A... |
| 13 | 2   | <a href="https://doi.org/10.1007/s10668-020-00878-9">https://doi.org/10.1007/s10668-020-00878-9</a> | India, China, Pakistan, Indonesia | NaN                                               | Air pollution aggravating COVID-19 lethality? ... | Ankit Gupta, Hemant Bherwani, Sneha Gautam, Sa... | 2020           | Gupta, A., Bherwani, H., Gautam, S., Anjum, S.... |
| 53 | 3   | <a href="https://doi.org/10.1007/s40201-020-00564-y">https://doi.org/10.1007/s40201-020-00564-y</a> | China                             | NaN                                               | Correlations between Meteorological Indicators... | Huiying Huang, Xiuji Liang, Jingxiu Huang, Zha... | 2020           | Huang, H., Liang, X., Huang, J., Yuan, Z., Ouy... |
|    |     | <a href="https://doi.org/10.1007/s40201-020-00564-y">https://doi.org/10.1007/s40201-020-00564-y</a> |                                   |                                                   | Ambient nitroaen                                  | Ye Yao, Jinhua ...                                |                | Yao, Y., Pan, J., ...                             |

### Split each paper based on their country and their corresponding admin level1

In [13]:

```
def tidy_split(df, column, sep='|', keep=False):
    """
    Split the values of a column and expand so the new DataFrame has one split
    value per row. Filters rows where the column is missing.

    Params
    -----
    df : pandas.DataFrame
        dataframe with the column to split and expand
    column : str
        the column to split and expand
    sep : str
        the string used to split the column's values
    keep : bool
        whether to retain the presplit value as it's own row

    Returns
    -----
    pandas.DataFrame
        Returns a dataframe with the same columns as `df`.
    """
    indexes = list()
    new_values = list()
    df = df.dropna(subset=[column])
    for i, presplit in enumerate(df[column].astype(str)):
        values = presplit.split(sep)
        if keep and len(values) > 1:
            indexes.append(i)
            new_values.append(presplit)
        for value in values:
```
