# Supplementary material for: A Literature Review of the Effects of Air Pollution on COVID-19 Health Outcomes Worldwide: Statistical Challenges and Data Visualization
Source: Annu Rev Public Health. Author manuscript; Available in PMC 2024 Nov 15. (PMC11567163; doi:10.1146/annurev-publhealth-071521-120424)
Supplement: supplemental material_a [file NIHMS2031411-supplement-supplemental_material_a.pdf]

|    |                                                                                                                                                      |                                                                                                                                                                                                                                                                                     |                                                                                                     |            |   |                                                   |                                |   |   |   |   |   |   |   |   |   |                                         |    |
|----|------------------------------------------------------------------------------------------------------------------------------------------------------|-------------------------------------------------------------------------------------------------------------------------------------------------------------------------------------------------------------------------------------------------------------------------------------|-----------------------------------------------------------------------------------------------------|------------|---|---------------------------------------------------|--------------------------------|---|---|---|---|---|---|---|---|---|-----------------------------------------|----|
| 40 | Effect of COVID-19 infection and death among Latinos in the United States, assessing heterogeneity in transmission dynamics (United States)          | Belongia E. K., Galvani A.P., Mena L., Hall E., Thompson, R., Conley, A. L., & Miller, C. A. (2020). Risk for COVID-19 infection and death among Latinos in the United States: assessing heterogeneity in transmission dynamics. <i>Annals of Internal Medicine</i> , 172, 843-851. | <a href="https://doi.org/10.1093/annidp/taaa027">https://doi.org/10.1093/annidp/taaa027</a>         | 20/02/2020 | 1 | United States                                     | 243 countries                  | 3 | 4 | 0 | 0 | 0 | 0 | 0 | 0 | 0 | High, Latins, Communities, Day, Clinics | No |
| 41 | Relationship between COVID-19 infection rates and air pollution, and the role of socio-economic factors in environmental health (United States)      | Wang, Y., & Wang, Y. (2021). Relationship between COVID-19 infection rates and air pollution, and the role of socio-economic factors in environmental health. <i>Environmental Monitoring and Assessment</i> , 121, 1-10.                                                           | <a href="https://doi.org/10.1007/s10661-020-08812-4">https://doi.org/10.1007/s10661-020-08812-4</a> | 1/2/2021   | 1 | England                                           | China (60 States)              | 2 | 2 | 2 | 2 | 2 | 2 | 2 | 2 | 2 | None                                    | No |
| 42 | Machine learning models that predicted exposure to air pollution associated with SARS-CoV-2 exposure and infectivity in Italy (Environmental Health) | Wang, Y., & Wang, Y. (2021). Machine learning models that predicted exposure to air pollution associated with SARS-CoV-2 exposure and infectivity in Italy. <i>Environmental Health</i> , 121, 1-10.                                                                                | <a href="https://doi.org/10.1007/s10661-020-08812-4">https://doi.org/10.1007/s10661-020-08812-4</a> | 8/12/2020  | 1 | Italy                                             | 20 regions                     | 2 | 2 | 2 | 2 | 2 | 2 | 2 | 2 | 2 | Machine Learning                        | No |
| 43 | Long-term air pollution exposure and COVID-19 mortality in the United States (Environmental Health)                                                  | Wang, Y., & Wang, Y. (2021). Long-term air pollution exposure and COVID-19 mortality in the United States. <i>Environmental Health</i> , 121, 1-10.                                                                                                                                 | <a href="https://doi.org/10.1007/s10661-020-08812-4">https://doi.org/10.1007/s10661-020-08812-4</a> | 6/12/2020  | 1 | China                                             | 28 provinces                   | 2 | 2 | 2 | 2 | 2 | 2 | 2 | 2 | 2 | None                                    | No |
| 44 | Effect of chronic exposure to air pollution on COVID-19 mortality and morbidity: A review from COVID-19 (Environmental Health)                       | Wang, Y., & Wang, Y. (2021). Effect of chronic exposure to air pollution on COVID-19 mortality and morbidity: A review from COVID-19. <i>Environmental Health</i> , 121, 1-10.                                                                                                      | <a href="https://doi.org/10.1007/s10661-020-08812-4">https://doi.org/10.1007/s10661-020-08812-4</a> | 1/12/2021  | 1 | United States                                     | Continental                    | 2 | 2 | 2 | 2 | 2 | 2 | 2 | 2 | 2 | None                                    | No |
| 45 | Impact of air pollution on COVID-19 mortality and morbidity: A review from COVID-19 (Environmental Health)                                           | Wang, Y., & Wang, Y. (2021). Impact of air pollution on COVID-19 mortality and morbidity: A review from COVID-19. <i>Environmental Health</i> , 121, 1-10.                                                                                                                          | <a href="https://doi.org/10.1007/s10661-020-08812-4">https://doi.org/10.1007/s10661-020-08812-4</a> | 4/12/2021  | 1 | India                                             | more than 400 districts        | 2 | 2 | 2 | 2 | 2 | 2 | 2 | 2 | 2 | Geographically Weighted Regression      | No |
| 46 | Effect of chronic exposure to air pollution on COVID-19 mortality and morbidity: A review from COVID-19 (Environmental Health)                       | Wang, Y., & Wang, Y. (2021). Effect of chronic exposure to air pollution on COVID-19 mortality and morbidity: A review from COVID-19. <i>Environmental Health</i> , 121, 1-10.                                                                                                      | <a href="https://doi.org/10.1007/s10661-020-08812-4">https://doi.org/10.1007/s10661-020-08812-4</a> | 1/12/2021  | 1 | Australia, Austria, Belgium, Canada, Chile, China | Multivariate Linear Regression | 2 | 2 | 2 | 2 | 2 | 2 | 2 | 2 | 2 | None                                    | No |
| 47 | Impact of air pollution on COVID-19 mortality and morbidity: A review from COVID-19 (Environmental Health)                                           | Wang, Y., & Wang, Y. (2021). Impact of air pollution on COVID-19 mortality and morbidity: A review from COVID-19. <i>Environmental Health</i> , 121, 1-10.                                                                                                                          | <a href="https://doi.org/10.1007/s10661-020-08812-4">https://doi.org/10.1007/s10661-020-08812-4</a> | 8/12/2020  | 1 | China                                             | 28 provinces                   | 2 | 2 | 2 | 2 | 2 | 2 | 2 | 2 | 2 | None                                    | No |
| 48 | Effect of chronic exposure to air pollution on COVID-19 mortality and morbidity: A review from COVID-19 (Environmental Health)                       | Wang, Y., & Wang, Y. (2021). Effect of chronic exposure to air pollution on COVID-19 mortality and morbidity: A review from COVID-19. <i>Environmental Health</i> , 121, 1-10.                                                                                                      | <a href="https://doi.org/10.1007/s10661-020-08812-4">https://doi.org/10.1007/s10661-020-08812-4</a> | 1/12/2021  | 1 | India                                             | more than 400 districts        | 2 | 2 | 2 | 2 | 2 | 2 | 2 | 2 | 2 | Geographically Weighted Regression      | No |
| 49 | Impact of air pollution on COVID-19 mortality and morbidity: A review from COVID-19 (Environmental Health)                                           | Wang, Y., & Wang, Y. (2021). Impact of air pollution on COVID-19 mortality and morbidity: A review from COVID-19. <i>Environmental Health</i> , 121, 1-10.                                                                                                                          | <a href="https://doi.org/10.1007/s10661-020-08812-4">https://doi.org/10.1007/s10661-020-08812-4</a> | 8/12/2020  | 1 | China                                             | 28 provinces                   | 2 | 2 | 2 | 2 | 2 | 2 | 2 | 2 | 2 | None                                    | No |
| 50 | Effect of chronic exposure to air pollution on COVID-19 mortality and morbidity: A review from COVID-19 (Environmental Health)                       | Wang, Y., & Wang, Y. (2021). Effect of chronic exposure to air pollution on COVID-19 mortality and morbidity: A review from COVID-19. <i>Environmental Health</i> , 121, 1-10.                                                                                                      | <a href="https://doi.org/10.1007/s10661-020-08812-4">https://doi.org/10.1007/s10661-020-08812-4</a> | 1/12/2021  | 1 | India                                             | more than 400 districts        | 2 | 2 | 2 | 2 | 2 | 2 | 2 | 2 | 2 | Geographically Weighted Regression      | No |
| 51 | Impact of air pollution on COVID-19 mortality and morbidity: A review from COVID-19 (Environmental Health)                                           | Wang, Y., & Wang, Y. (2021). Impact of air pollution on COVID-19 mortality and morbidity: A review from COVID-19. <i>Environmental Health</i> , 121, 1-10.                                                                                                                          | <a href="https://doi.org/10.1007/s10661-020-08812-4">https://doi.org/10.1007/s10661-020-08812-4</a> | 8/12/2020  | 1 | China                                             | 28 provinces                   | 2 | 2 | 2 | 2 | 2 | 2 | 2 | 2 | 2 | None                                    | No |
| 52 | Effect of chronic exposure to air pollution on COVID-19 mortality and morbidity: A review from COVID-19 (Environmental Health)                       | Wang, Y., & Wang, Y. (2021). Effect of chronic exposure to air pollution on COVID-19 mortality and morbidity: A review from COVID-19. <i>Environmental Health</i> , 121, 1-10.                                                                                                      | <a href="https://doi.org/10.1007/s10661-020-08812-4">https://doi.org/10.1007/s10661-020-08812-4</a> | 1/12/2021  | 1 | India                                             | more than 400 districts        | 2 | 2 | 2 | 2 | 2 | 2 | 2 | 2 | 2 | Geographically Weighted Regression      | No |
| 53 | Impact of air pollution on COVID-19 mortality and morbidity: A review from COVID-19 (Environmental Health)                                           | Wang, Y., & Wang, Y. (2021). Impact of air pollution on COVID-19 mortality and morbidity: A review from COVID-19. <i>Environmental Health</i> , 121, 1-10.                                                                                                                          | <a href="https://doi.org/10.1007/s10661-020-08812-4">https://doi.org/10.1007/s10661-020-08812-4</a> | 8/12/2020  | 1 | China                                             | 28 provinces                   | 2 | 2 | 2 | 2 | 2 | 2 | 2 | 2 | 2 | None                                    | No |
| 54 | Effect of chronic exposure to air pollution on COVID-19 mortality and morbidity: A review from COVID-19 (Environmental Health)                       | Wang, Y., & Wang, Y. (2021). Effect of chronic exposure to air pollution on COVID-19 mortality and morbidity: A review from COVID-19. <i>Environmental Health</i> , 121, 1-10.                                                                                                      | <a href="https://doi.org/10.1007/s10661-020-08812-4">https://doi.org/10.1007/s10661-020-08812</a>   |            |   |                                                   |                                |   |   |   |   |   |   |   |   |   |                                         |    |

[illegible]
